# Supplementary material for: Effects of Continuous Prenatal Low Dose Rate Irradiation on Neurobehavior, Hippocampal Cellularity, mRNA and miRNA Expression on B6C3F1 Mice
Source: Preprints.org preprint supplement (doi:10.20944/preprints202408.0050.v1), 2024-08-01
Supplement: Supplementary file 1 [file supplementary]

## Supplement

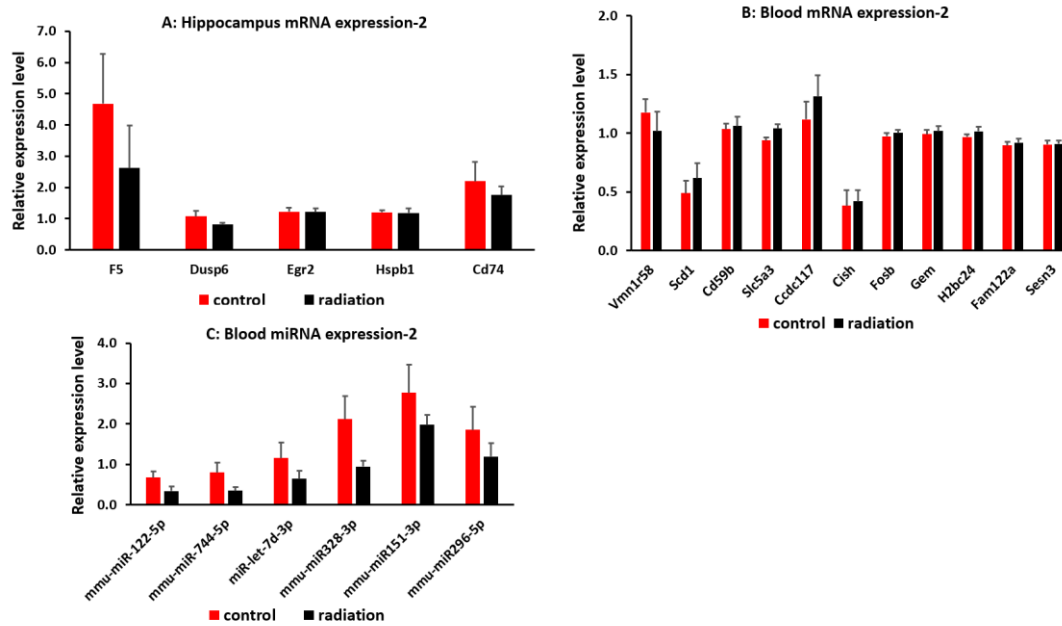

**Figure Legend:** Real-time qPCR indicates no significant change in the expressions of *F5*, *Dusp6*, *Egr2*, *Hspb1*, *CD74* in the hippocampus (Fig. Suppl 1A), and of *Vmn1r58*, *Scd1*, *Cd59b*, *Slc5a3*, *Ccdc117*, *Cish*, *Fosb*, *Gem*, *H2bc24*, *Fam122a*, *Sesn3* in whole blood (Fig. Suppl 1B). In the blood, there is no significant change in miR-122-5p, miR-744-5p, miR-let-7d-3p, miR-328-3p, miR-151-3p, miR-296-5p (Fig. Suppl 1C).
